# Supplementary material
Source: Springer Nature journal article supplement (https://www.springermedizin.de/resource/supplementary/12967_2009_408_MOESM3_ESM.pdf/9576406)

# Stroke

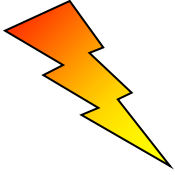

Excitotoxicity  
Oxidative Stress

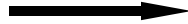

Reactive astrocytes    Activated microglia

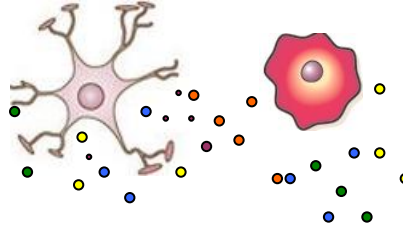

TNF- $\alpha$ , IL-1 $\beta$ , IL-6  
MCP-1, MIP-1 $\alpha$ , MMPs

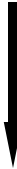

**Neuronal Death**

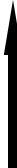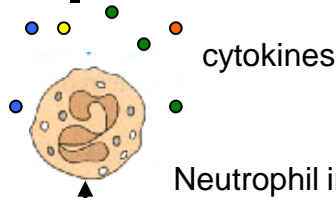

cytokines

Neutrophil infiltration

Endothelial  
cells

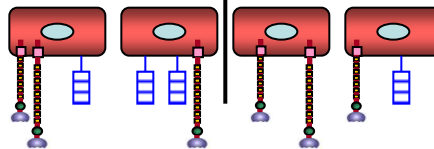

Upregulation of  
ICAM-1 and selectins

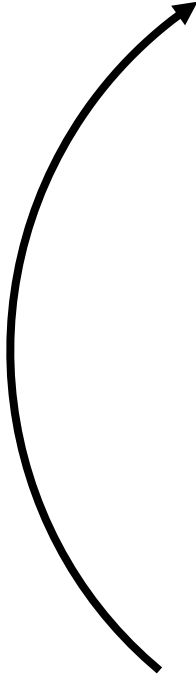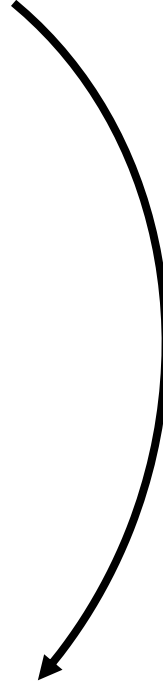

Supplement: MOESM3 [file 9576406]
